# Supplementary material for: Synthesis of porphyrin-based 2D ytterbium metal organic frameworks for efficient photodynamic therapy
Source: Royal Society of Chemistry journal article supplement (doi:10.1039/d2ra06655f), 2022-01-01
Supplement: d2ra06655f1.pdf [file d2ra06655f1.pdf]

## Supporting Information

# Synthesis of Porphyrin-Based 2D Ytterbium Metal Organic Frameworks for Efficient Photodynamic Therapy

Xiang Zheng, ‡<sup>a,b,c</sup> Jun Zhong, ‡<sup>a,b,c</sup> Meng-Yuan Dong,<sup>a</sup> Yuan Wen,<sup>a,b,c</sup> Ai-Zheng Chen,<sup>a,b,c</sup>

<sup>a</sup> College of Chemical Engineering, Huaqiao University, Xiamen 361021, P. R. China.

<sup>b</sup> Institute of Biomaterials and Tissue Engineering, Huaqiao University, Xiamen 361021, P. R. China.

<sup>c</sup> Fujian Provincial Key Laboratory of Biochemical Technology (Huaqiao University), Xiamen 361021, P. R. China.

\* Correspondence: zhengxiang@hqu.edu.cn (X. Z.), azchen@hqu.edu.cn (A.-Z. C.); Tel.: +86-592-616-2326

‡ These authors contribute equally.

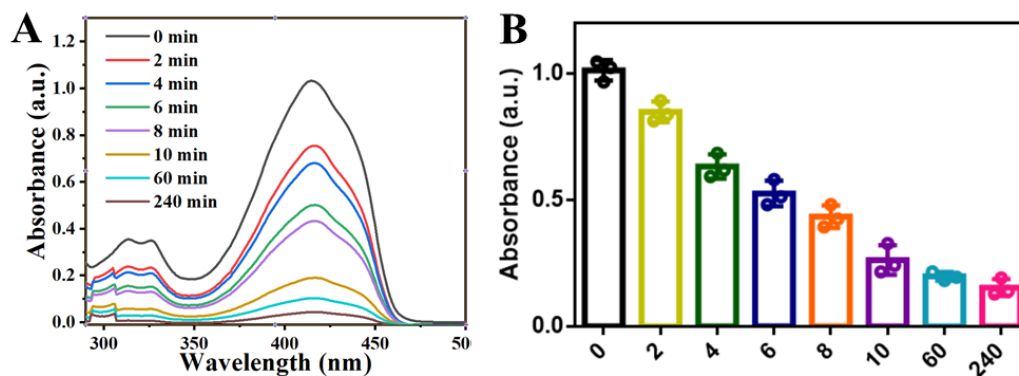

**Figure S1.** A) UV-Vis absorbance variation and B) the corresponding peaks integration of DPBF and Yb-TCPP MOFs mixture under 655 nm illumination. Noted that Yb-TCPP MOFs have been treated under 655 nm illumination with maximum power for 1 h prior to the experiment.

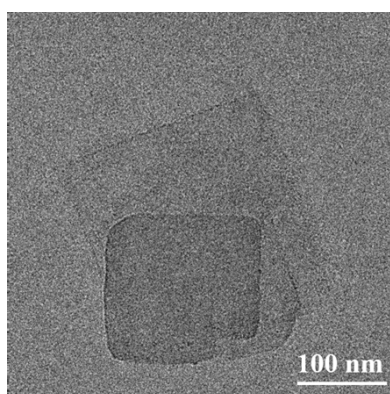

**Figure S2.** TEM image of Yb-TCPP MOFs exposed under 655 nm illumination with maximum power for 1 h.
